# Supplementary material for: Modification of bacterial microcompartments with target biomolecules via post-translational SpyTagging
Source: Royal Society of Chemistry journal article supplement (doi:10.1039/d3ma00071k), 2023-01-01
Supplement: d3ma00071k1.pdf [file d3ma00071k1.pdf]

1 **Modification of Bacterial Microcompartments by Target Biomolecules via Post-Translational**

2 **SpyTagging.**

3 David M Beal<sup>a\*†</sup>, Mingzhi Liang<sup>a\*</sup>, Ian Brown<sup>a</sup>, James D Budge<sup>a</sup>, Emily R Burrows<sup>b</sup>, Kevin Howland<sup>a</sup>, Phoebe Lee<sup>a</sup>,  
4 Sarah Martin<sup>c</sup>, Andrew Morrell<sup>a</sup>, Emi Nemoto-Smith<sup>d</sup>, Joanne Roobol<sup>a</sup>, Maria Stanley<sup>a</sup>, C Mark Smales<sup>a,e†</sup>, Martin  
5 J Warren<sup>a,f,e†</sup>

6 **Supplementary**

7 **Figure 1 – Scheme showing the azido SpyTag 1 N<sub>3</sub> and SpyTag 3 N<sub>3</sub> synthesised by SPPS.**

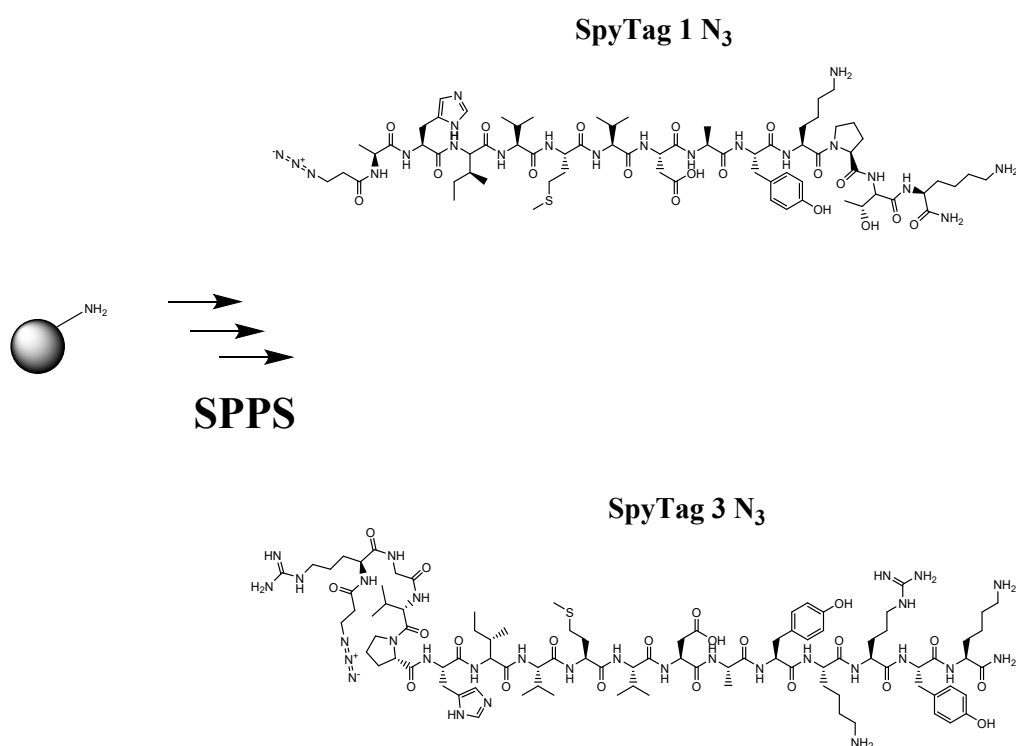

8

9 **SpyTag 1 N<sub>3</sub> amino acid sequence**

10 N<sub>3</sub> - AHIVMVDAYKPTK

11 **SpyTag 3 N<sub>3</sub> amino acid sequence**

12 N<sub>3</sub> - RGVPHIVMVDAYKRYK

13

14

15 **Figure 2 – LCMS analysis of SpyTag 1 N<sub>3</sub> (A) and SpyTag 3 N<sub>3</sub> (B)**

16 **A**

17 SpyTag 1 N<sub>3</sub> RMM = 1568.86 Da

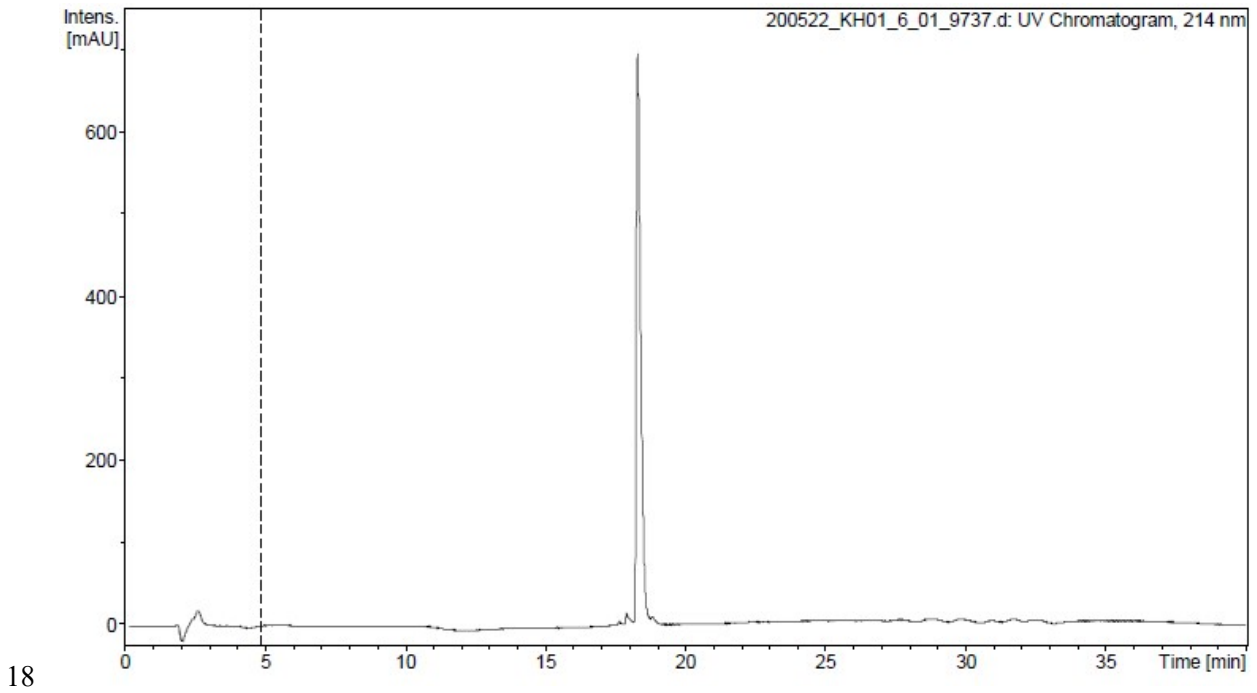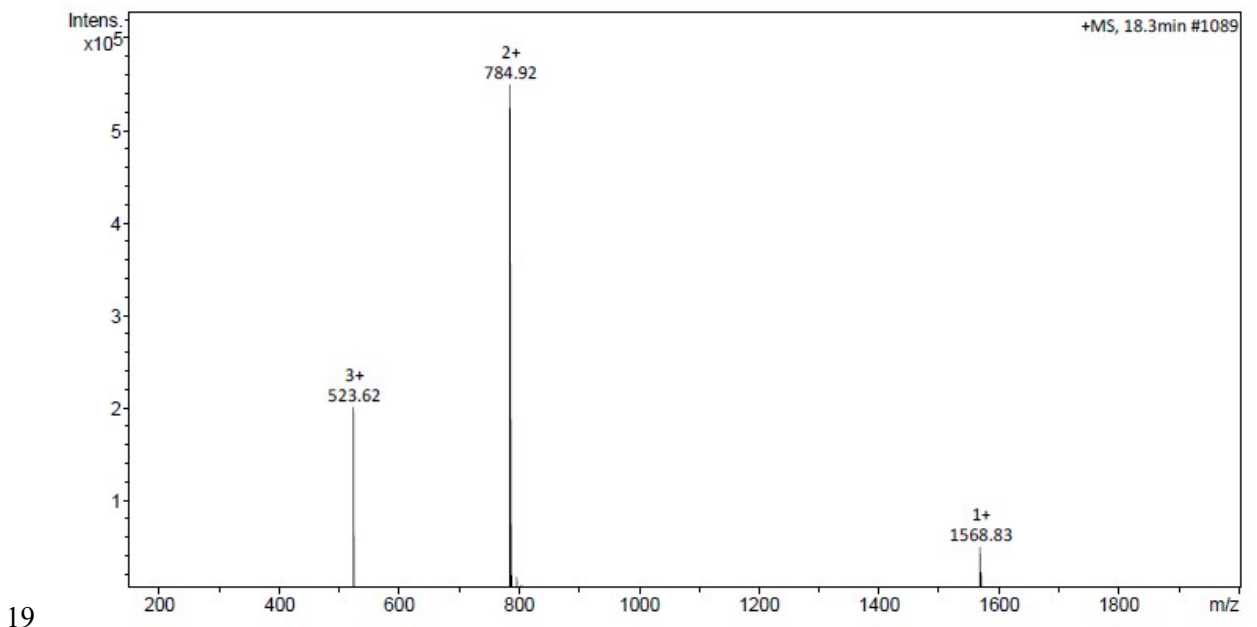

20

21

22 **B**

23 SpyTag 3 N<sub>3</sub> RMM = 2028.42 Da

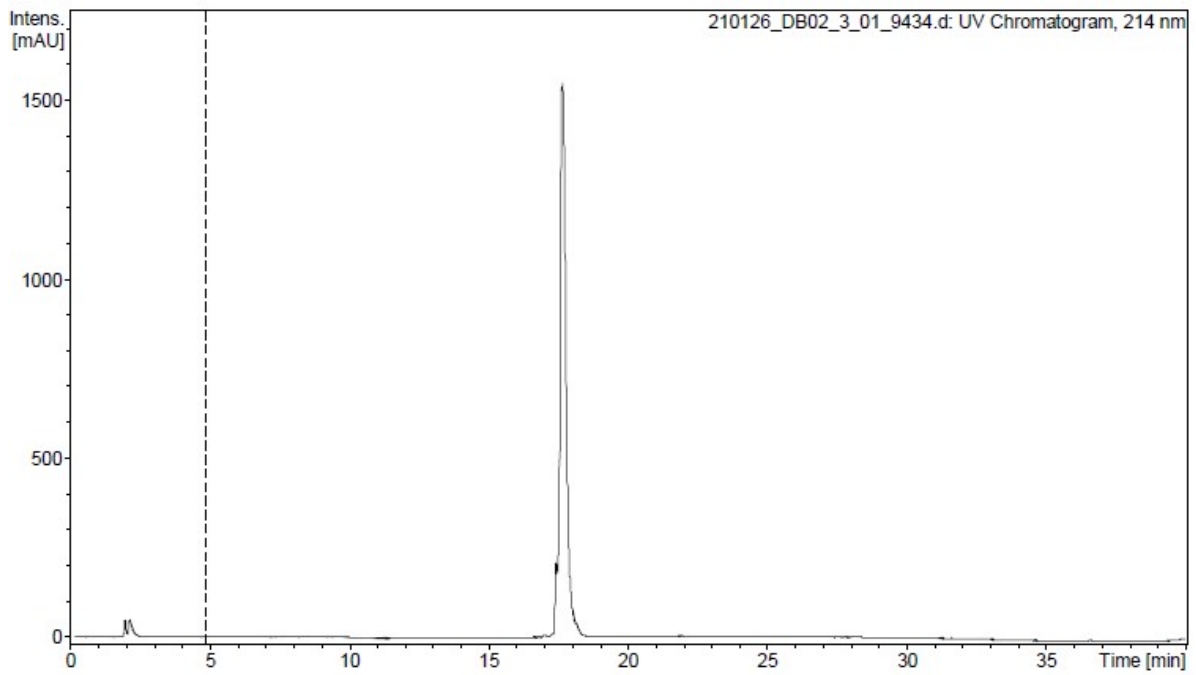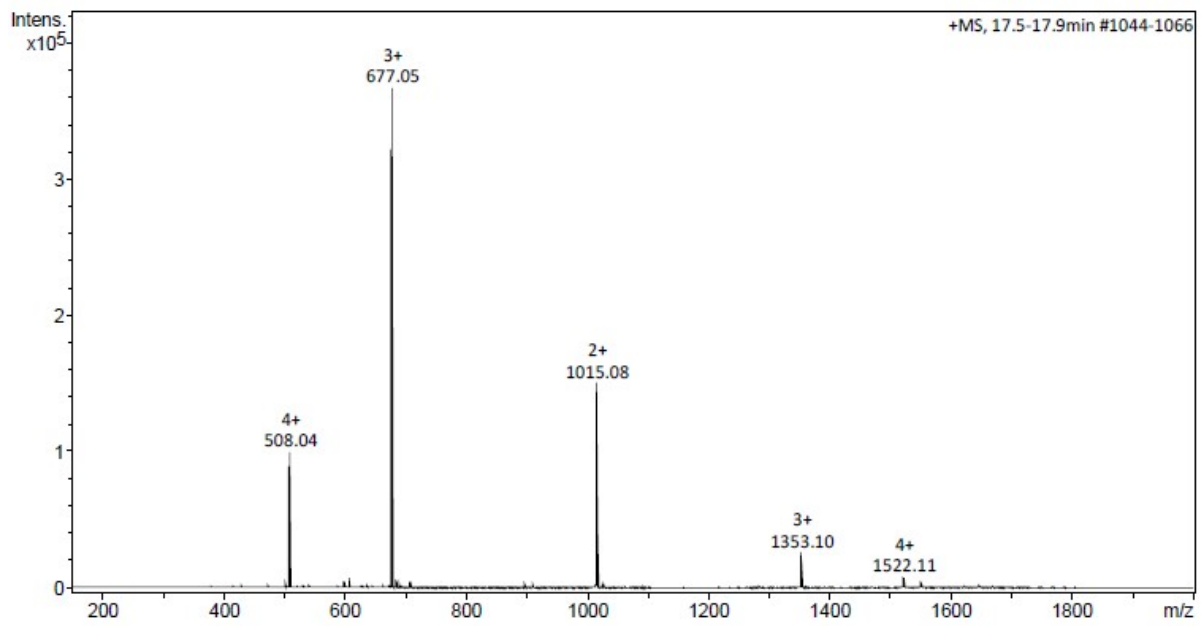

26

27

28

29 **Figure 3. His tagged Citrine - plasmid map (A) and protein sequence (B)**

30 **A**

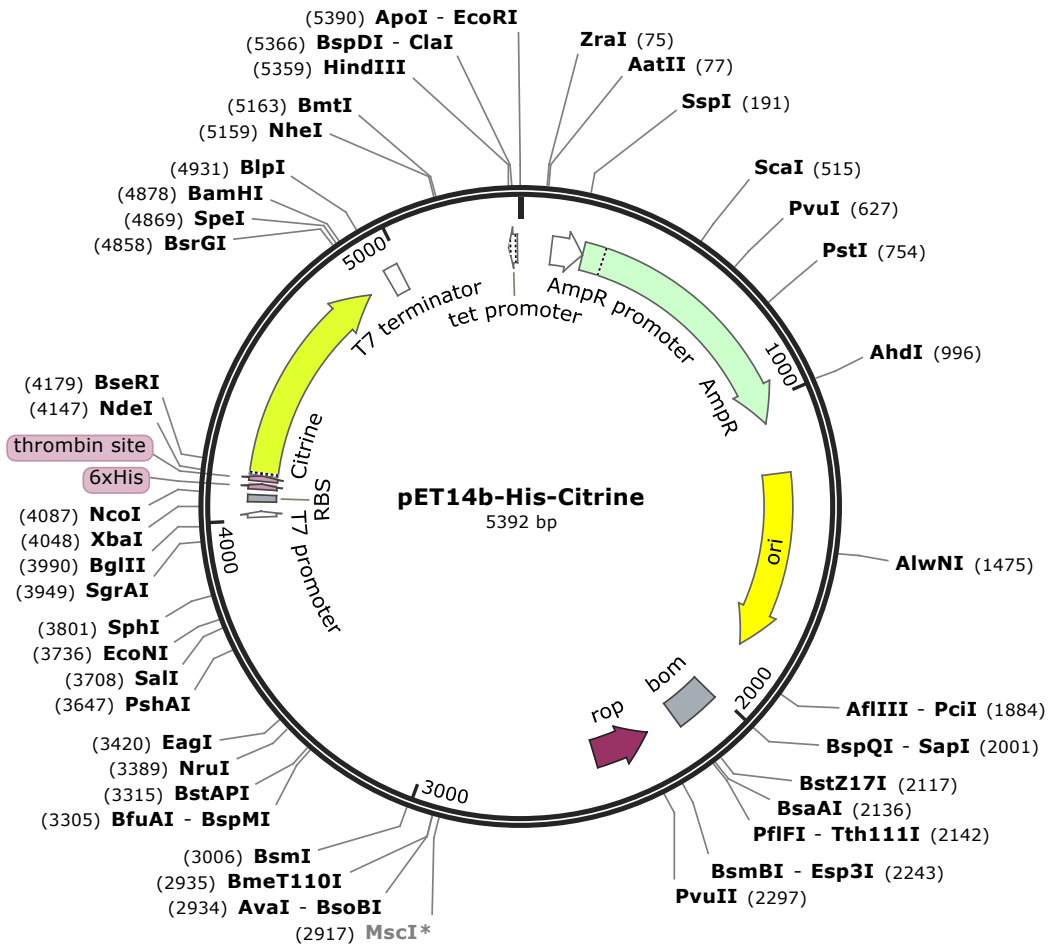

31

32 **B. Citrine amino acid sequence**

33 MGSSHHHHHHSSGLVPRGSHMVSKGEELFTGVVPILVELDGDVNGHKFSVSGEGEDATYGKLT LKFICTTGKLPV  
 34 PWPTLVTTFGYGLMCFARYPDHMKQHDFFKSAMPEGYVQERTIFFKDDGNYKTRAEVKFEGDTLVNRIELKGIDF  
 35 KEDGNILGHKLEYNVSHNVYIMADKQKNGIKVNFKIRHNIEDGSVQLADHYQQNTPIGDGPVLLPDNHLSYQS  
 36 ALSKDPNEKRDHMLLEFVTAAGITLGMDELYK

37

38

39 Figure 4 ES MS analysis of the Citrine BCN SpyTag1 N<sub>3</sub> conjugate.

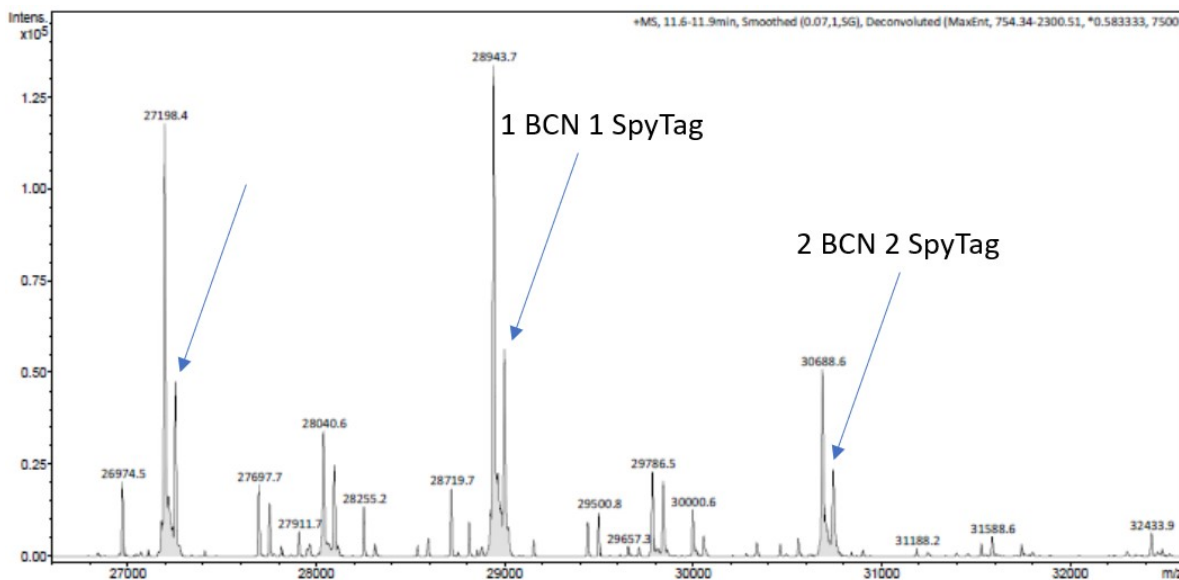

40

41

42

43 Figure 5 ES MS analysis of the Citrine BCN SpyTag1 N<sub>3</sub> conjugate.

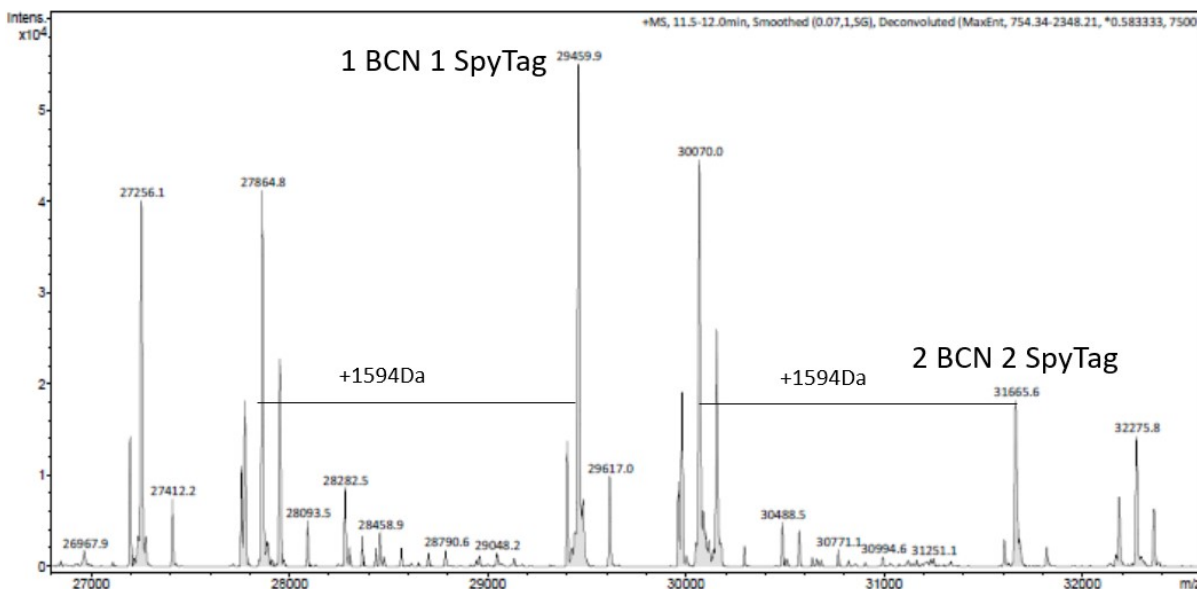

44

45

46

47

48 **Figure 6** Electron micrographs of purified BMC. A) eBMC formed by three shell proteins. B) sc-  
49 eBMC form by three shell proteins with spycatcher sequence fused in one of the shell proteins,  
50 PduK.

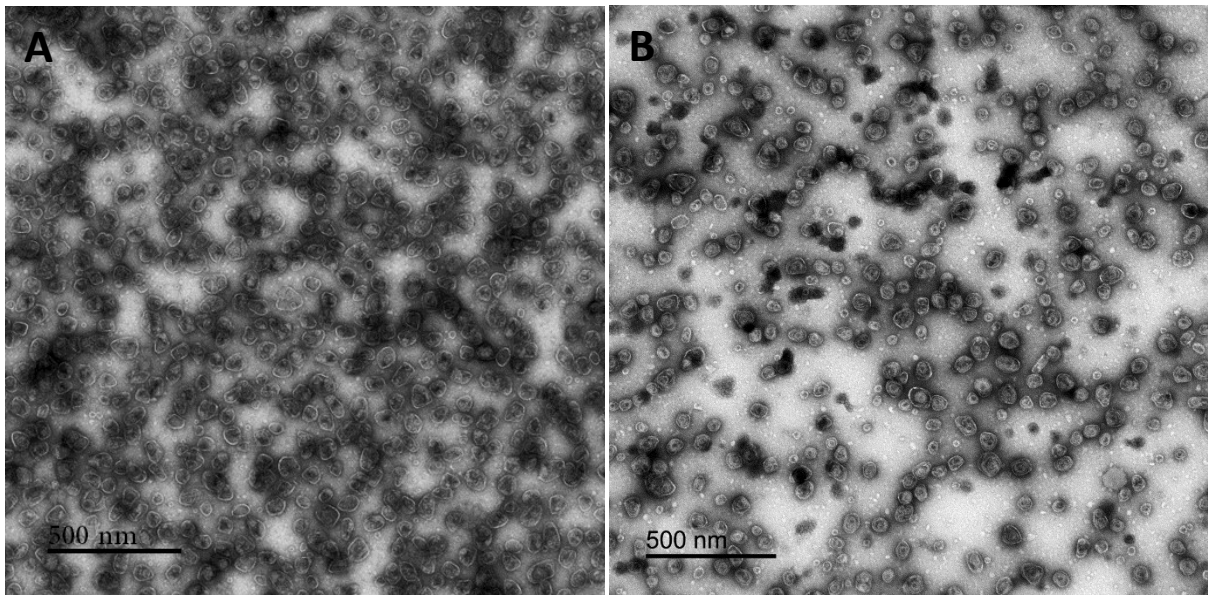

51
